# Supplementary material for: Palliative Home Care Nurses’ Experiences of End-of-Life Patients Expressing a Wish to Die: A Qualitative Study
Source: Research Square preprint supplement (doi:10.21203/rs.3.rs-6914214/v1), 2025-06-30
Supplement: Supplementary file 1 [file 61c8bf9c662707a4b41fb99f.docx]

# Supplementary File 1 – Interview Guide

Interview Guide for Exploring Palliative Home Care Nurses’ Experiences of End-of-Life Patients Expressing a Wish to Die

This semi-structured interview guide was developed specifically for the study “Palliative Home Care Nurses’ Experiences of End-of-Life Patients Expressing a Wish to Die: A Qualitative Study.” The guide was designed to explore nurses’ experiences, thoughts, and emotional responses when caring for patients at the end of life who express a wish to die.

1. **What do you consider to be the challenges and rewards of working with seriously ill patients?**
2. **Can you describe how you are emotionally affected when a patient expresses a wish not to live anymore?**
3. **Can you tell me about your preparedness to respond to patients who ask for help to die?**
4. **Can you share a specific situation that you found particularly difficult to handle regarding a patient’s wish to die or request for assistance in dying?**
5. **Do you find that it is common for patients to express a wish to end their life or ask for help to die?**
6. **Have you ever been emotionally affected by a patient who no longer wishes to live or who wants help to end their life, to the extent that you found it difficult to stop thinking about it?**
7. **Can you tell me more about that situation or those situations?**
8. **Have you ever experienced a patient taking their own life due to their serious illness?**
9. **Can you tell me more about that situation or those situations?**
10. **What role do you think the ASIH (Advanced Home Care and Palliative Homecare) team plays in these situations?**
